# Supplementary material
Source: Elsevier journal article supplement (https://www.sciencedirect.com/science/article/pii/S0210569122000687)
Supplement: mmc1 [file S0210569122000687:mmc1.pdf]

## MATERIAL SUPLEMENTARIO

### SECCIÓN I. INDICACIONES DE TRANSPORTE EN ECMO.

**Recomendación 1.** Cuando un paciente con indicación de ECMO se encuentre en un hospital que no disponga de ECMO, recomendamos que esta terapia se inicie en el hospital de origen por parte del equipo del hospital de referencia y posteriormente el paciente sea trasladado en ECMO hasta el centro de referencia para proseguir el tratamiento. [Clase A-II]

Los pacientes con indicación de ECMO ingresados en una UCI que no dispone de esta terapia se encuentran en una situación clínica muy inestable en la que cualquier movilización puede suponer un empeoramiento clínico y riesgo vital. En este contexto, un transporte interhospitalario hasta un centro de referencia que disponga de ECMO puede suponer un elevado riesgo de eventos adversos y de mortalidad. Las experiencias nacionales e internacionales en transporte de pacientes en ECMO han demostrado que los eventos graves y la mortalidad en este tipo de transportes son infrecuentes si son realizados por equipos especializados<sup>1,2,3,4</sup>. Además, la supervivencia de los pacientes en que se inicia la ECMO en centros que no disponen de esta técnica por parte de equipos de hospitales de referencia no es inferior a la de los pacientes en que la ECMO se inicia en el propio centro<sup>5</sup>. Dado que el transporte de pacientes en ECMO es factible y seguro siempre que sea realizado por equipos expertos establecidos y entrenados<sup>6,7</sup>, los pacientes que tengan indicación de esta terapia deberían ser valorados por el equipo de su hospital de referencia y, en caso de confirmar la indicación, iniciarse la terapia allí donde se encuentren para posteriormente ser transportados hasta el centro donde se continuará el tratamiento.

**Recomendación 2.** Los pacientes en ECMO candidatos a una terapia de destino (p. ej. trasplante pulmonar, cardíaco o asistencias ventriculares) y que se encuentren en un centro sin estas terapias deben ser transportados en ECMO al centro de terapia definitiva, siempre de acuerdo con el centro receptor. [Clase A-III]

El trasplante cardíaco y pulmonar solo se realiza en unos pocos centros de referencia. Hay hospitales que disponen de ECMO pero no de las terapias definitivas tales como el trasplante o las asistencias ventriculares de larga duración. De esta manera, los pacientes que se encuentren en ECMO y que puedan ser candidatos a otra terapia, tras una valoración por parte del centro de referencia, deben ser transportados en ECMO hasta dicho centro<sup>8</sup>.

**Recomendación 3.** Los pacientes en lista de trasplante pulmonar o cardíaco que presenten agudización grave de su patología de base con inestabilidad clínica que dificulte un transporte convencional y que se encuentren en un centro no trasplantador deben ser valorados de forma conjunta por el centro de trasplante para decidir la indicación o no de ECMO como puente a trasplante y el posterior transporte en ECMO. [Clase A-III]

En los pacientes en lista de trasplante cardíaco o pulmonar que presentan agudización grave de su patología de base, el soporte con ECMO VV o VA puede ser necesario y, en algunos casos, puede suponer el soporte invasivo de elección como puente al trasplante. En caso de que el paciente se encuentre en un centro no trasplantador, es indispensable la coordinación con el equipo del centro de trasplante para valorar la mejor estrategia para el transporte del paciente hasta dicho centro. Dado que el transporte en ECMO es factible y seguro cuando se realiza por equipos expertos<sup>6,7</sup>, si la ECMO está indicada como puente al trasplante, deberá valorarse el implante e inicio de este soporte siempre consensuando la indicación y la estrategia de canulación previo al transporte hasta el hospital trasplantador.

## SECCIÓN II. SISTEMA DE CENTROS DE REFERENCIA EN ECMO.

**Recomendación 4.** El transporte de pacientes en ECMO implica una organización logística compleja, por lo que es altamente recomendable que se trabaje activamente en el aspecto organizativo y logístico. Es recomendable la colaboración entre instituciones y regiones. [Clase A-III]

Los fallos de logística son frecuentes y albergan todo tipo de problemas organizativos: retrasos en la llegada del vehículo, vehículo erróneo o no adecuado, retrasos en aeropuertos, escasez de infraestructuras o fallos de comunicación entre hospitales emisores y receptores<sup>1,9</sup>. Los programas de transporte en ECMO deben trabajar activamente para minimizar estos riesgos que afectan directamente tanto a la seguridad del paciente como a la eficiencia del sistema promoviendo la colaboración entre las distintas instituciones implicadas<sup>10,11</sup>.

**Recomendación 5.** Con la finalidad de proporcionar una equidad de tratamiento entre toda la población, es necesario disponer de un sistema de centros de referencia de ECMO. Para ello es necesaria la creación de una red de transporte a nivel regional-estatal que cuente con equipos de transporte con la experiencia y el entrenamiento adecuados para garantizar el transporte en ECMO a unidades de gran volumen (centros de ECMO). [Clase A-III]

Aunque no existe evidencia de alto nivel sobre este aspecto, la bibliografía actual sostiene que el transporte en ECMO se debe organizar desde los centros con experiencia, capacitados y entrenados en la técnica. Debido a su complejidad y la posible aparición de complicaciones graves, el equipo responsable del transporte debe tener experiencia en medicina intensiva, transporte de pacientes críticos y fisiología, tecnología, manejo y canulación en ECMO<sup>12,13,14</sup>.

La Extracorporeal Life Support Organization (ELSO) publicó en 2015 unas guías de transporte en ECMO<sup>15</sup>, pero no hacen referencia al número de casos ni de transportes necesarios a realizar por un centro de referencia con el equipo ECMO móvil para mantener esta competencia en su cartera de servicios. No obstante, se puede hacer una extrapolación de otros informes recientes sobre ECMO hospitalaria que hacen referencia a los casos necesarios por hospital y por año para considerarse centros ECMO de referencia.

El significado de "Centro de referencia de ECMO" no queda bien definido. Con respecto a los adultos, un consenso de la Red Internacional de ECMO propone que el número mínimo de casos anuales sea de 20 y, de estos, al menos 12 deben utilizar la ECMO como asistencia respiratoria<sup>16</sup>. Las recomendaciones realizadas por la SEMICYUC por consenso de expertos hacen referencia al número de 30 casos anuales recomendado en algunos artículos<sup>8,17</sup>. Para pacientes neonatales y pediátricos, Freeman et al. han demostrado que se necesita un número mínimo de 20-22 casos anuales para aumentar la tasa de supervivencia en comparación con

los centros de bajo volumen de ECMO al año<sup>18</sup>. Se concluye que los centros de gran volumen tienen menos probabilidad de muerte que los centros de bajo volumen. La carga mínima anual de casos que se asoció significativamente con una menor mortalidad fue de 22 (intervalo de confianza del 95%, 22-28).

En otro estudio se analizaron los 3867 pacientes menores de 20 años en ECMO mediante la base de datos del Healthcare Cost and Utilization Project de 2000 a 2009. Un volumen de casos mayor a 30 al año se asoció con más supervivencia hospitalaria en pacientes pediátricos con ECMO cardíaca<sup>19</sup>. Barbaro et al demostraron en el 2015 mediante un análisis retrospectivo de un registro internacional de ECMO (1989 a 2013), que los centros de ECMO con más de 30 tratamientos anuales para adultos tenían una mortalidad significativamente menor que las unidades con menos de 6 casos por año<sup>20</sup>.

Así pues, un número de entre 20 y 30 casos anuales puede considerarse el mínimo necesario para conseguir una curva de aprendizaje adecuada y para mantener la competencia en ECMO. La asociación volumen-mortalidad debería favorecer y potenciar una política basada en la centralización del tratamiento con ECMO en los centros con más experiencia y evitar el inicio de programas de ECMO en otros hospitales. De hecho, hay grupos de expertos que apoyan la creación de centros regionales que serían receptores de pacientes que precisan el uso de este tipo de asistencia mecánica<sup>7,16,21,22</sup>. El Reino Unido, Australia e Italia organizan sus servicios ECMO de esta manera, con centros regionales con posibilidad de realización de transporte interhospitalario altamente capacitado. En la experiencia de Suecia<sup>4</sup>, al igual que otros trabajos publicados, los pacientes sometidos a un transporte en ECMO tienen aproximadamente la misma tasa de mortalidad que los pacientes no transportados en ECMO. Por este motivo, sería necesaria la creación de una organización de transporte a nivel regional-estatal que realice el transporte de ECMO a unidades de gran volumen con seguridad.

Para la capacitación de estos centros regionales es importante el aspecto formativo. Los centros experimentados deben enseñar a los profesionales de los hospitales de derivación los criterios para una detección temprana de candidatos a ECMO, programar el traslado al centro de referencia de forma precoz y optimizar el tratamiento antes del realizar el transporte.

Proponemos que la ECMO se organice a nivel regional y nacional para brindar la mejor atención posible a los pacientes candidatos o subsidiarios de la técnica en centros expertos con un gran volumen de casos anuales. Esto requiere la derivación a un centro experto en ECMO, donde la técnica se ofrece como parte de un algoritmo de tratamiento, puede estar asociada con mejores resultados y permite la oportunidad de tratamiento a todos los pacientes, independientemente de dónde se encuentren. El uso inadecuado de la ECMO puede aumentar los costes hospitalarios y exponer a pacientes a riesgos importantes.

Debido a las ventajas que proporciona el conocimiento compartido, la capacitación del personal y de las instalaciones, el volumen de casos se debe considerar como un factor muy determinante para la creación de centros de referencia de ECMO<sup>16</sup>. El número de transportes necesarios para mantener la competencia en ECMO también es desconocido, pero está ligada al número de casos y a la experiencia global del centro.



### SECCIÓN III. MEDIOS DE TRANSPORTE EN ECMO.

**Recomendación 6. Es recomendable que los programas de ECMO regionales o nacionales personalicen y adecuen sus medios de transporte y logística a su propia realidad.** [Clase A-III]

No existen pruebas científicas sobre el tipo de transporte a utilizar, sino una serie de experiencias internacionales que difieren en su logística y medios, los cuales han sido adaptados a su propia realidad<sup>1,9,23,24,25,26,27</sup>.

Debido a esta gran diversidad de entornos y situaciones, se recomienda analizar los siguientes aspectos en la región cubierta por cada programa ECMO<sup>1,9,28</sup>.

- **Distancia entre el centro emisor y centro ECMO.** Es el mayor determinante a la hora de planificar el tipo de transporte a realizar, afectando al tiempo de respuesta y a la seguridad del transporte en ECMO. La probabilidad de sufrir eventos adversos durante el traslado en ECMO es mayor cuanto mayor es el tiempo de traslado, sin que se haya asociado a mortalidad.
- **La meteorología adversa** afecta en mayor medida al transporte aéreo.
- **El equipo material y personal a trasladar** determinará el espacio necesario del vehículo. El peso total influirá en la posibilidad de utilizar el helicóptero.
- **La presencia y características de las infraestructuras ligadas intrínsecamente al transporte** como el tipo de carreteras, presencia de helisuperficies adecuadas y aeropuertos habilitados.
- **La disponibilidad de medios de transporte adecuados.**
- **La experiencia del equipo que va a realizar el transporte en los distintos medios.**

**Recomendación 7. El medio de transporte recomendado para distancias menores a 400 km es el terrestre.** [Clase B-III]

El medio de transporte más utilizado en los programas de transporte en ECMO es el terrestre mediante el uso de ambulancias convencionales adaptadas o específicas para dicho uso. El transporte terrestre tiene la ventaja de que cuenta con pocas limitaciones en cuanto al volumen y el peso de material o número de integrantes del equipo que pueden viajar tanto para un transporte ECMO primario como secundario. Además, requiere menor grado de formación específica que el transporte aéreo y las ambulancias suelen contar con mayores reservas de electricidad, oxígeno y otros fungibles. En relación con los eventos adversos, estos son menos frecuentes por tierra y la capacidad de resolución de complicaciones graves durante el transporte terrestre es mayor que en otros medios<sup>1</sup>. Por este motivo, debe ser el medio de

transporte de elección para todos aquellos transportes en ECMO de una distancia menor a 400 km<sup>15</sup>.

**Recomendación 8. El medio aéreo de ala fija estará recomendado en distancias superiores a los 600 km. En el caso de transporte insular se recomienda personalizar la decisión en función de la distancia a recorrer y el personal a trasladar.** [Clase B-III]

Las distancias superiores a 600 km pueden conllevar traslados terrestres de más de 6 horas, incrementando exponencialmente los riesgos de eventos secundarios tanto relacionados con el paciente, como los dependientes del suministro de los vehículos<sup>19</sup>.

Las distancias que los helicópteros pueden recorrer sin escala dependen del modelo de aparato utilizado y de su capacidad de carga. En general, para distancias mayores de 600 km necesitan una parada para repostar.

El transporte insular podría ser efectuado tanto por helicópteros como aviones dependiendo principalmente de la distancia a recorrer<sup>10</sup>, así como de la logística, tipo de máquinas y experiencia del personal en los distintos medios aéreos.

**Recomendación 9. El uso del helicóptero como medio de transporte estaría recomendado en aquellas ocasiones en las que se asegure la viabilidad, seguridad y la eficiencia del tiempo de traslado.** [Clase B-III]

El uso del helicóptero para transporte en ECMO está descrito y es de gran utilidad en muchas regiones que tienen en común una experiencia previa en transporte sanitario amplia utilizando este tipo de transporte. Generalmente se suele recomendar para distancias entre 400 y 600 km<sup>15</sup>. Este medio precisa más infraestructuras, así como un mayor entrenamiento profesional y agilidad del proceso logístico<sup>23,24,26</sup>.

Por ello, se definen cuatro aspectos a tener en cuenta a la hora de elegir este medio de transporte:

- La viabilidad viene determinada por la disponibilidad del tipo de helicóptero adecuado, tanto por potencia como por espacio operativo.
- La eficiencia del traslado está relacionada con la presencia de helisuperficies en el hospital emisor y receptor, así como sus características, entre ellas: habilitación aeronáutica, entrada directa al hospital o necesidad de utilizar una ambulancia, habilitación para vuelo nocturno o peso admitido de la helisuperficie elevada. Este último puede limitar el acceso para helicópteros de tamaño mediano o grande con carga, lo cual limitaría su uso para traslado en ECMO.
- La seguridad del transporte, que incluye la específica del tipo de aparato utilizado y el plan de vuelo, así como la del propio equipo de ECMO.
- La existencia de profesionales formados en este tipo de transporte.

**Recomendación 10. Recomendamos que la decisión y elección del medio de transporte se sustente en principios que guíen la buena toma de decisiones. Estos principios se basan en la disponibilidad de servicios de traslado adecuados, tiempo de viaje y seguridad. Estas variables están interrelacionadas.** [Clase B-III]

Los transportes aéreos son costosos y potencialmente peligrosos y no deben realizarse a menos que sea necesario. La elección entre avión o helicóptero debe realizarse siguiendo un análisis de coste versus beneficio, utilizando criterios como la distancia y tiempo de viaje, la infraestructura de aterrizaje disponible, la capacidad de carga del recurso y las condiciones climáticas.

La modalidad de transporte aéreo (avión o helicóptero) puede variar según el paciente, la geografía y el clima. Cada organización de transporte también tendrá que definir sus planes según sus disponibilidades, porque la elección óptima puede variar según el caso (colaboración con el ejército, disponibilidad de aviones medicalizados civiles, etc.). En todo caso el vehículo elegido debe tener un espacio adecuado con alta capacidad de carga para acomodar un equipo multiprofesional con un amplio equipamiento y unas necesidades específicas durante el traslado<sup>29</sup>.

Uno de los factores que se utilizan para decidir sobre el transporte aéreo es el impacto que supone el retraso temporal excesivo empleado por otros medios en el curso de la enfermedad. En la estimación del tiempo se deben considerar el embarque y desembarque del paciente y la posibilidad de un traslado secundario desde el lugar de aterrizaje hasta el destino final.

Si se espera que la duración del traslado supere las 3-4 horas por tierra por la distancia o estado del tráfico, se debe considerar el transporte aéreo<sup>15</sup>.

La mayor desventaja de los aviones es que requieren aeropuertos y los hospitales rara vez están cerca, lo que inevitablemente requiere transferencias terrestres.

Si la seguridad de la aeronave, la tripulación o el paciente pueden verse comprometidas durante el vuelo, se debe buscar una alternativa al transporte aéreo<sup>30</sup>.

**Recomendación 11. En los transportes primarios puede ser recomendable el empleo de medios de transporte diferentes en el viaje ida y en el de vuelta si ello acorta el tiempo hasta el inicio del soporte en los pacientes en situación de riesgo vital inminente.** [Clase A-III]

En ocasiones, bien por la velocidad a la que se deteriora el paciente, bien por el momento en que se ha producido la alerta/valoración de la conveniencia del soporte con ECMO, el margen de tiempo del que se dispone para iniciarlo es corto. En dicho supuesto, se puede considerar el empleo del medio de transporte que más rápidamente pueda trasladar al equipo ECMO al centro emisor, sin que necesariamente dicho vehículo deba ser empleado en el traslado de regreso. Esta posibilidad permite actuar con celeridad en caso de que el vehículo adecuado para el traslado del paciente en ECMO no esté disponible de modo inmediato.





## **SECCIÓN IV. CARACTERÍSTICAS DE LOS VEHÍCULOS DE TRANSPORTE, EQUIPAMIENTO Y MATERIAL PARA EL TRANSPORTE DE PACIENTES EN ECMO.**

**Recomendación 12.** Es recomendable que los vehículos destinados al transporte de pacientes que reciben soporte con ECMO dispongan de una cabina amplia que admita una camilla de traslado que permita el acceso completo al paciente y a los diferentes dispositivos y que cuente con asientos para al menos tres profesionales. [Clase A-III]

Aunque la mortalidad del transporte de pacientes en ECMO es muy baja<sup>31</sup>, la mayor parte de los eventos adversos con consecuencias inmediatas y en los que el tiempo de reacción es muy corto se debe a problemas con el equipamiento<sup>9</sup>. Por ello, un buen diseño de la cabina es esencial para asegurar una respuesta rápida. No está establecido de manera uniforme cuál es la superficie o volumen mínimo que debe tener la cabina asistencial para un transporte en ECMO, pero en caso de transportes terrestres en ambulancia sí existe un consenso respecto a la conveniencia de que la camilla esté situada en el centro y que el espacio permita acceder al paciente desde cualquier ángulo (360°)<sup>32</sup>. A tal fin, es frecuente que las ambulancias destinadas a este transporte hayan sido expresamente adaptadas<sup>23,32,33</sup>, sean vehículos adaptados previamente para el traslado de pacientes especiales (obesidad mórbida)<sup>34</sup> o bien sean vehículos tipo camioneta/camión/autobús adaptados como ambulancia<sup>35</sup>. En caso de transportes aéreos puede que no sea posible disponer de la camilla en posición central, pero debe garantizarse el acceso completo durante todo el transporte tanto al paciente como a la consola, cánulas y circuito de ECMO. La disponibilidad de una cabina de techo alto facilita que la carga/descarga del paciente se realice de forma más segura.

Los pacientes trasladados en ECMO habitualmente están más estables una vez instaurado el soporte extracorpóreo de lo que estaban previamente a la canulación y el traslado. Sin embargo, la dependencia del dispositivo de ECMO y la potencial gravedad de cualquier complicación relacionada con el paciente y/o con el dispositivo hacen recomendable que le acompañen en la cabina al menos tres miembros del equipo de traslado, debiendo ser estos el médico líder de equipo experto en ECMO, la enfermera especialista en ECMO y la enfermera de críticos (ver sección V), aunque idealmente la cabina debería poder acomodar con seguridad hasta cinco miembros del equipo de traslado.

**Recomendación 13.** Los vehículos destinados al transporte de pacientes que reciben soporte con ECMO deben disponer de mecanismos de carga/descarga del paciente que no requieran que el equipo de transporte levante cargas pesadas. La camilla de traslado debe ser capaz de soportar el peso adicional que implica el equipo. Se debe disponer de los medios adecuados para fijar con seguridad tanto la camilla como todo el equipamiento médico adicional necesario. [Clase A-III]

Diversas publicaciones citan expresamente el empleo de camillas de transporte modificadas/adaptadas para el traslado de pacientes en ECMO o incluso específicamente diseñadas para tal fin<sup>26,33,36</sup>. Con frecuencia tienen dos niveles o “pisos”, con el paciente en el superior y espacio para toda la monitorización y aparataje en el inferior. Dichas camillas permiten fijar con seguridad todos los dispositivos y disponerlos de modo que sea posible mantenerlos conectados al paciente sin riesgo de acodamientos o desconexiones accidentales. En ocasiones, si no es posible disponer de una camilla de tales características, se debe contar con medios homologados para la fijación de la ECMO en el vehículo de transporte, de manera que los elementos que forman parte del circuito estén siempre anclados<sup>34</sup>.

La camilla cargada con el paciente y el equipamiento que le acompaña tiene un peso considerablemente superior al de una camilla con un paciente convencional. El desplazamiento vertical a pulso de la camilla o su desplazamiento por una rampa inclinada empujada por el personal sanitario es una maniobra no exenta de riesgo, por lo que idealmente debería contarse con plataformas hidráulicas que permitan realizar esta carga sin que el peso del conjunto camilla-paciente-ECMO recaiga sobre el personal.

**Recomendación 14. El sistema eléctrico del vehículo de transporte debe ser capaz de suministrar energía eléctrica a todo el equipamiento médico durante la totalidad del traslado. Dicha capacidad no sólo hace referencia a la potencia de suministro sino también al voltaje suministrado y número de enchufes disponibles.** [Clase A-III]

Este es un punto de máxima importancia dada la dependencia de gran parte del equipamiento (bomba de ECMO, calentador, respirador, bombas de infusión...) de la disponibilidad de energía eléctrica. La mayor parte de dispositivos modernos disponen de baterías de respaldo, pero debe tenerse en cuenta que dichas baterías sólo están destinadas a suplir los fallos de corriente momentáneos, pero no para proporcionar la electricidad necesaria durante todo el traslado.

El sistema de suministro eléctrico del vehículo debe disponer de las características adecuadas, en términos de voltaje, amperaje y potencia, para proporcionar la energía a los dispositivos médicos que se emplearán en el traslado. No es infrecuente encontrar en la literatura referencias a fallos de suministro eléctrico que causan eventos críticos durante el traslado en ECMO<sup>19</sup>, por lo que es responsabilidad del equipo de transporte conocer si las características del suministro eléctrico del vehículo son adecuadas y suficientes para el equipamiento médico.

En este sentido, el calentador (*“ECMO heater”*) es un dispositivo que merece una consideración especial. En primer lugar, porque es un dispositivo que no dispone de batería y su funcionamiento es totalmente dependiente del suministro eléctrico externo. En segundo

lugar, porque requiere de una potencia de suministro eléctrico que suele superar la capacidad proporcionada por la mayoría de las ambulancias. Por último, porque se trata de un elemento imprescindible tanto para traslados prolongados como para traslados de pacientes menores de 40 kg, aunque puede ser recomendable incluso en otros tipos de traslado en función de las condiciones ambientales y por el riesgo de que la duración del traslado se prolongue más de lo previsto.

No está establecida una potencia nominal de suministro eléctrico concreta. Algunos autores citan que equipan expresamente la ambulancia con un inversor principal con una potencia de 2000 vatios y un inversor de respaldo con una potencia de 1800 vatios<sup>33</sup> pero dichos datos son sólo una referencia dado que las características de los dispositivos empleados varían entre los distintos equipos de ECMO. Otros expertos (datos no publicados) refieren que una potencia instalada igual o superior a 2000 vatios es suficiente para suministrar energía eléctrica al conjunto de consola de ECMO, calentador, monitor, respirador y bombas de infusión.

El helicóptero es un medio de transporte que puede presentar limitaciones significativas en lo que respecta al suministro eléctrico. Por un lado, es posible que no disponga de tomas de corriente de 220 voltios y, por otro, es posible que la potencia total que pueda suministrar esté relativamente limitada. Estos aspectos deben ser comprobados por el equipo de transporte previamente al traslado. Determinados modelos precisan que el helicóptero esté en marcha para que funcione el suministro eléctrico. Algunos equipos deciden llevar una batería externa de respaldo en estos casos<sup>10</sup>.

El número de tomas necesarias, adaptadores, prolongadores, convertidores-transformadores y tipo de conexiones eléctricas deben estimarse y prepararse cuidadosamente siempre y muy especialmente en los traslados internacionales.

**Recomendación 15. El suministro de gases medicinales del vehículo, específicamente el suministro de oxígeno, debe ser suficiente no sólo para cubrir las necesidades del respirador y el oxigenador durante el traslado, sino que debe incluir una previsión de prolongación del traslado por causas sobrevenidas. En función del transporte y del paciente debe valorarse la necesidad de otros gases como el aire medicinal o el óxido nítrico. [Clase A-III]**

La cantidad de oxígeno mínima disponible en el vehículo de traslado está determinada por la duración del transporte y por el consumo esperado. Dicha cantidad debe ser estimada previamente al traslado. De todos modos, la mayoría de los autores que describen sus dispositivos de traslado hablan de una capacidad de suministro de oxígeno “ampliada”, refiriéndose a cantidades superiores a 6000 litros para traslados terrestres<sup>33,36</sup>. Los problemas de agotamiento de oxígeno son relativamente comunes y potencialmente muy graves, por lo

que sería deseable que el sistema de suministro de oxígeno disponga de indicadores de cálculo de tiempo restante<sup>28</sup>.

Aparte de los depósitos de oxígeno fijos en el vehículo, será imprescindible contar al menos con dos balas de oxígeno portátiles para las movilizaciones, una como fuente de oxígeno para la ECMO y otra para el respirador.

Paralelamente debe valorarse también la necesidad de otros gases, como el aire medicinal (puede ser necesario para el mezclador de gases de la ECMO o para respiradores neonatales) o el óxido nítrico. El suministro de aire medicinal puede llevarse a cabo a partir de aire almacenado en bombonas o mediante compresores de aire<sup>33</sup>. Este último método sería de elección dado que en este caso el suministro de aire comprimido es ilimitado.

**Recomendación 16. El vehículo de transporte debe contar con el material electromédico mínimo de una unidad de soporte vital avanzado para el tratamiento de un paciente crítico, incluyendo un respirador de altas prestaciones, bombas de perfusión endovenosa suficientes y un monitor-desfibrilador que tenga capacidad para la monitorización de la presión arterial invasiva durante el traslado.** [Clase A-III]

Más allá del material médico general de las unidades de soporte vital avanzado, siguiendo la legislación vigente<sup>37</sup>, el transporte de pacientes en ECMO tiene unas características que requiere de material electromédico de altas prestaciones. Es necesario un sistema de aspiración que puede ser portátil o bien puede formar parte del equipamiento estructural del vehículo de traslado con capacidad de generación de vacío que alcance los -400 mmHg y que permita la conexión de drenajes torácicos<sup>33</sup>. El respirador de traslado debe ser adecuado para ventilar la función pulmonar residual durante el traslado y para solventar posibles situaciones críticas de disfunción del soporte con ECMO. Es habitual que para tal fin sea necesario recurrir a niveles de PEEP superiores a 10 cmH<sub>2</sub>O<sup>36,38</sup>. Los pacientes pediátricos/neonatales precisan de respiradores que puedan suministrar y monitorizar volúmenes adecuados a su tamaño, lo cual suele requerir un software específico. Los pacientes en ECMO pueden requerir un número elevado de perfusiones endovenosas. Para finalizar, la monitorización de la presión arterial invasiva es indispensable para un transporte en ECMO, ya que la no invasiva está sometida a interferencias derivadas de los movimientos y ruidos que la hacen impracticable.

**Recomendación 17. En caso de transporte pediátrico en ECMO debe tenerse en cuenta la necesidad de material específico ajustando los requerimientos de tamaño, así como de consumo eléctrico y autonomía a sus peculiaridades.** [Clase A-III]

Los transportes pediátricos en ECMO son frecuentemente de mayor recorrido y tiempo, lo que implica un mayor uso del traslado aéreo<sup>1,10,25,26</sup>. Además, pueden requerir material específico, lo que puede implicar el uso de vehículos de mayor espacio y autonomía. Por ello, las

ambulancias convencionales, helicópteros y aviones de menor tamaño no serían recomendables para este tipo de traslado por la falta de espacio operativo.

**Recomendación 18. El equipo de ECMO debe llevar todo el material necesario para la realización del procedimiento completo de canulación y entrada en ECMO de forma autónoma, así como para la resolución de las posibles complicaciones. Este material deberá ir recogido en una lista de comprobación. [Clase A-III]**

Los equipos de transporte de ECMO deben contar con todo el material necesario para el procedimiento, tanto de canulación como para el tratamiento de aquellas complicaciones que puedan producirse durante el mismo. Estos materiales variarán en función del tamaño del paciente (neonatal, pediátrico o adulto) y de las peculiaridades de cada centro (Tabla 2).

Dada la naturaleza crítica de este transporte deben anticiparse posibles complicaciones y retrasos y, por tanto, contar con material adicional suficiente por si surgen complicaciones. Se debe tener en cuenta que una parte de este material específico de ECMO no estará disponible en el centro donde vaya a realizarse la canulación, por lo que este material específico deberá estar duplicado para asegurar su disponibilidad en caso de que fuera necesario por rotura, pérdida o estado defectuoso del mismo.

Los componentes adicionales que pueden aumentar la seguridad del paciente incluyen sensores para monitorizar el flujo, la temperatura, la saturación venosa y hemoglobina y un detector de burbujas con o sin regulación automática de la bomba<sup>15</sup>.

**Recomendación 19. Debe valorarse la necesidad de productos sanguíneos durante el transporte. En este caso es recomendable disponer de un sistema de transporte de productos refrigerados para la conservación de los hemoderivados. [Clase B-III]**

Es aconsejable disponer de hemoderivados de reserva durante el transporte, específicamente de concentrados de hematíes. Esto se debe a que el sangrado es una complicación frecuente. Las necesidades estimadas de productos sanguíneos durante el traslado de un paciente en ECMO serán determinadas caso a caso en función del estado del paciente y tiempo estimado del traslado<sup>39</sup>. Se aconseja solicitar cuanto antes al centro emisor los productos sanguíneos necesarios para la canulación y transporte, de manera que estos estén disponibles a la llegada del equipo canulador.

Los hemoderivados necesitan unas condiciones de almacenamiento concretas que deben respetarse también durante el traslado<sup>40,41</sup>. Para su conservación, especialmente en trayectos largos, debe disponerse de algún sistema adecuado a tal fin<sup>33</sup>. Dicho sistema puede ser un recipiente aislante o bien un refrigerador incorporado en el vehículo de traslado. Recomendamos el uso de contenedores refrigerados portátiles específicos y homologados junto a indicadores de temperatura que permiten el transporte y el almacenamiento temporal seguro de los productos sanguíneos<sup>42,43</sup>.

**Recomendación 20. Debe realizarse una gestión estricta de los hemoderivados que garantice su trazabilidad. [Clase A-III]**

Recomendamos que el hospital que envía los productos sanguíneos cuente con procedimientos para garantizar que se transporten de manera adecuada a la cabecera del paciente desde el laboratorio de transfusión. Durante el traslado el equipo de ECMO tiene la responsabilidad de garantizar la trazabilidad total de los productos sanguíneos utilizados en tránsito.

Aconsejamos que, a la llegada al hospital receptor, se remita el contenedor de transporte de productos sanguíneos al laboratorio de transfusión para garantizar que el proceso sea adecuado. El laboratorio de transfusión receptor debe asegurarse de que se contabilicen todas las unidades transferidas durante el traslado y debe informar al laboratorio de transfusión de envío del destino de los hemoderivados<sup>44</sup>. La responsabilidad sobre los productos trasladados a partir de este momento recaerá en el hospital receptor, que los gestionará de acuerdo con sus procedimientos locales y su programa de gestión de la calidad transfusional.

**Recomendación 21. Es recomendable disponer de un sistema de medición de gases sanguíneos y del estado de la coagulación portátil en el vehículo de traslado. [Clase B-III]**

En todos los traslados, pero especialmente en los de larga duración, es importante la monitorización del paciente. Para ello se recomienda incluir un analizador de sangre portátil que permita al menos la monitorización de gasometría, iones, glucemia y hemoglobina. Por otra parte, el control de la anticoagulación también deberá poderse realizar durante todo el transporte, mediante el uso de medidores portátiles.

**Recomendación 22. El personal sanitario que participe en transportes en ECMO debe ir identificado y dotado del material y los equipos de protección individual necesarios para poder realizar dichos transportes con seguridad. [Clase A-III]**

La seguridad del equipo humano es un factor imprescindible a tener en cuenta para todo transporte en ECMO. Para ello el personal debe llevar calzado con botas o zapatos de seguridad, llevar ropa de abrigo y/o impermeable en función de las condiciones meteorológicas y reflectante en caso de tener que abandonar el vehículo en zonas interurbanas y aerosuperficies. Todo el personal debe ir fácilmente identificable con su tarjeta identificativa del centro hospitalario. Además debe llevar encima la documentación de identidad para los transportes aéreos y tener en cuenta que el pasaporte de la tripulación y del paciente pueden ser necesarios en los transportes internacionales.

## SECCIÓN V. COMPOSICIÓN DEL EQUIPO DE TRANSPORTE EN ECMO.

**Recomendación 23. Los equipos de transporte en ECMO deben estar compuestos por personal hospitalario del centro de ECMO de referencia, que asumirán la valoración, indicación, canulación, transporte y posterior tratamiento del paciente.** [Clase A-II]

La complejidad de los transportes en ECMO hace necesaria la cohesión de los equipos que van a realizar esta técnica fuera de su centro. Múltiples ejemplos y modelos nacionales e internacionales coinciden con que la mejor estructuración de equipos de transporte de ECMO es la de equipos cerrados formados por personal de un centro de ECMO de referencia que son los encargados de todo el proceso desde la valoración del paciente hasta el tratamiento de soporte definitivo<sup>45</sup>.

**Recomendación 24. El equipo mínimo para un transporte primario de pacientes adultos debe estar compuesto por un intensivista líder del equipo experto en ECMO y transporte, un médico experto en la canulación, una enfermera experta en ECMO y una enfermera experta en paciente crítico (incluido su transporte). Los perfiles profesionales que asuman cada uno de los roles deben adaptarse al funcionamiento de cada centro.** [Clase A-II]

La composición del equipo de transporte en ECMO puede ser variable entre los distintos centros y debe poder ajustarse a las características específicas de cada transporte, pero existen unos roles profesionales mínimos que deben estar presentes en todo transporte primario. Es imprescindible que el equipo al completo tenga experiencia y autonomía tanto en la canulación, inicio de ECMO y tratamiento de sus complicaciones (tabla 3) como en las particularidades del transporte sanitario.

En el caso de los transportes primarios, la composición mínima del equipo será un intensivista o pediatra intensivista del centro de referencia experto en ECMO y transporte, un médico canulador (cirujano cardíaco, intensivista o pediatra experto en canulación percutánea) y una enfermera de críticos especialista en ECMO o perfusionista del centro de referencia<sup>15</sup>. De forma más somera esta cuestión ya fue abordada en el consenso SEMES-SEMICYUC sobre transporte interhospitalario<sup>46</sup>.

Además será importante la presencia de una enfermera experta en paciente crítico familiarizada con la unidad de transporte (Tablas 4 y 5). Respecto a esta última figura, lo descrito más frecuentemente en la literatura es una enfermera de críticos del hospital de referencia para asegurar la estabilidad del paciente durante la canulación y el traslado<sup>28,16,25,26,35,47,48,49</sup>. En el caso de los transportes pediátricos, contar con enfermería de críticos del hospital de referencia no es opcional salvo en los casos en que existan unidades específicas de transporte crítico pediátrico con suficiente formación en ECMO, donde la



enfermería de esa unidad podría asumir al paciente en la fase de traslado, siempre que tenga experiencia con pacientes críticos pediátricos y con el visto bueno del líder del equipo. Si, coyunturalmente, el equipo no tuviera formación en transporte, se incorporaría una enfermera experta en transporte sanitario. De hecho, es común en muchos centros contar para el traslado con el apoyo de personal de los servicios de emergencias.

**Recomendación 25. El equipo mínimo para un transporte secundario debe estar compuesto por un intensivista líder del equipo experto en ECMO y transporte, una enfermera experta en ECMO y una enfermera experta en paciente crítico.** [Clase B-III]

Dado que en un transporte secundario el traslado se realiza con la ECMO implantada por el equipo del hospital emisor y el paciente debe haber sido estabilizado previamente al transporte, se puede simplificar el equipo suprimiendo la figura del médico canulador y manteniendo el resto de los roles que serán necesarios para el control del paciente<sup>15</sup>. Pese a ello, debe valorarse y es recomendable que el médico que realice el transporte disponga también de competencias en canulación y resolución de problemas derivados de la misma para poder responder a las complicaciones en caso de que sucedan.

**Recomendación 26. En caso de transportes en ECMO de pacientes pediátricos (primarios y secundarios), el equipo al completo debe estar conformado por personal especialista en pediatría.** [Clase A-II]

Las particularidades de los pacientes críticos pediátricos, incluidos aquellos que requieren soporte en ECMO, hacen que requieran ser atendidos por personal experto en pediatría. De esta manera, un transporte en ECMO de un paciente neonatal o pediátrico necesitará un equipo compuesto por los mismos roles profesionales descritos en las recomendaciones 24 y 25, pero siendo estos especialistas en el tratamiento del paciente pediátrico.

## **SECCIÓN VI. FORMACIÓN Y ENTRENAMIENTO DE LOS EQUIPOS DE TRANSPORTE.**

**Recomendación 27. Para realizar el implante del soporte con ECMO, su manejo y el traslado al centro de referencia, se precisa de un equipo multidisciplinar altamente cualificado, con formación y entrenamiento específico. [Clase A-II]**

El transporte en ECMO tiene un alto riesgo de morbilidad y mortalidad. El equipo de transporte en ECMO debe tener formación, entrenamiento y experiencia en el tratamiento del paciente crítico, del paciente en soporte con ECMO, incluyendo la canulación y el manejo del circuito ECMO, y en el transporte del paciente crítico<sup>28</sup>. Se han comunicado fallecimientos durante el proceso de canulación para el inicio de ECMO en transportes primarios, lo que indica que estos procedimientos invasivos solo deben ser realizados por personal experto. Su creación y formación inicial y continuada debe contar con la cooperación de las instituciones sanitarias y de los especialistas implicados. De este modo, los pacientes podrán ser transportados de un modo seguro y se les podrá proporcionar un tratamiento de emergencia adicional durante el traslado en caso de ser necesario.

**Recomendación 28. Solo podrá considerarse el inicio de un programa de transporte con ECMO cuando el equipo tenga una experiencia suficiente en el manejo de estos pacientes en el hospital de referencia, haya sido entrenado en las etapas de transporte y sea capaz de dar respuesta a las posibles complicaciones que puedan surgir. [Clase A-III]**

Para el inicio de un programa de transporte en ECMO es imprescindible que el propio centro cuente con amplia experiencia en la técnica, así como en la resolución de los problemas derivados. Sólo si se consigue realizar la suficiente curva de aprendizaje en un entorno más controlado y con supervisión como es el propio centro hospitalario con programa de ECMO se puede garantizar la seguridad del paciente cuando este procedimiento se realiza en hospitales donde el equipo canulador no cuenta con más soporte específico que el del propio equipo.

Aunque la ELSO no define el número mínimo de canulaciones y entradas en ECMO necesarias para tener la experiencia suficiente, en base a las publicaciones y recomendaciones de otros centros con mayor experiencia internacional, se recomienda que los miembros del equipo tengan experiencia de haber realizado al menos 15 canulaciones antes de poder actuar de manera independiente y con seguridad<sup>50</sup>.

**Recomendación 29. El transporte de pacientes en ECMO requiere de una formación específica que reúna las habilidades técnicas y no técnicas necesarias para poder realizar este procedimiento con seguridad. Esta formación debe estar basada en simulación. [Clase A-III]**

Las particularidades del transporte de pacientes en ECMO requieren de un plan de formación específico más allá de la formación general en ECMO. Esta formación debe contemplar habilidades técnicas (como procedimientos de canulación, movilización del paciente, carga en la camilla y ambulancia, etc.) y no técnicas (como formación en Crisis Resource Management —CRM— para el entrenamiento de equipos complejos). Existen sociedades y organizaciones internacionales, nacionales y locales que ofrecen cursos teórico-prácticos para mantener las competencias clínicas del equipo de transporte en ECMO<sup>17</sup>. Esta formación debe complementarse en centros acreditados con alta experiencia.

Es conveniente que todos los componentes del equipo realicen entrenamientos de forma conjunta para coordinar la respuesta en cadena al paciente subsidiario de transporte en ECMO. Estos entrenamientos deben ser simulaciones estructuradas y guiadas por expertos en simulación clínica, con objetivos generales y específicos claros y centrados tanto en habilidades técnicas como no técnicas y deben constar de un *debriefing* posterior que ayude a mejorar el proceso de aprendizaje. Cada miembro del equipo debe entrenar según su función, apoyados por una hoja de verificación (*checklist*) durante las diferentes fases del transporte<sup>17,24,25,51,52</sup>.

**Recomendación 30. El equipo de transporte en ECMO requiere formación continuada teórico-práctica, así como la revisión de su casuística y protocolos para mejorar los resultados asistenciales siguiendo la mejor evidencia científica. [Clase A-III]**

No existe un consenso de cuándo y cuántas veces se deben realizar los entrenamientos y simulaciones periódicas del equipo de transporte ECMO. Basándonos en las experiencias publicadas, se considera recomendable realizar al menos una o dos simulaciones por equipo al año o un número mayor si se realizan menos de 10 transportes al año<sup>51</sup>. Cada transporte debe servir para el autoaprendizaje de todo el equipo y, con la consecuente recogida de casos y participación en los registros nacionales e internacionales, fomentar la mejora continua del transporte del paciente en ECMO.

**Recomendación 31. El personal que realice transporte aéreo en ECMO requiere de una formación y capacitación específica más allá de la propia de cualquier transporte en ECMO. [Clase A-III]**

Los transportes aéreos en ECMO se han asociado con mayor probabilidad de sufrir eventos adversos, sin asociarse a una mayor mortalidad<sup>1</sup>. Los riesgos inherentes al transporte aéreo se ven agravados por la complejidad de mantener la función del soporte extracorpóreo durante toda la misión. El medio aéreo presenta ciertas características a considerar como el ruido, las vibraciones, los cambios en la presión atmosférica, la necesidad de llevar equipos médicos homologados y los riesgos inherentes para el personal de vuelo, principalmente en el helicóptero, que conlleva el seguimiento de estrictos protocolos y formación en seguridad<sup>28</sup>.

Una buena comprensión de los riesgos potenciales permite anticipar y prevenir. Las series publicadas como las de Broman reflejan que las complicaciones más comunes que aparecen durante el transporte aéreo en ECMO incluyen períodos de inestabilidad hemodinámica y sangrado<sup>45</sup>. Muy pocas complicaciones fueron causadas por fallos en el conocimiento del equipo médico. Esto resalta la importancia de la experiencia, la capacitación y la preparación especializada del personal antes del transporte. En la formación continuada se deben incluir aspectos esenciales de seguridad aérea y operaciones en tierra incluida la aproximación y acceso a las aeronaves; el conocimiento del equipo de emergencia a bordo y los procedimientos en caso de accidente y evacuación para el paciente y la tripulación.

## SECCIÓN VII: SEGURIDAD CLÍNICA DEL TRANSPORTE EN ECMO.

**Recomendación 32.** El uso de hojas de verificación (*checklist*), procedimientos estandarizados y otras ayudas cognitivas es imprescindible para mejorar la seguridad del transporte en ECMO. [Clase A-III]

La alta complejidad que envuelve el transporte de pacientes en ECMO hace que deban minimizarse los riesgos derivados del error humano, con el objetivo de garantizar la máxima seguridad para el paciente. Con este fin recomendamos las hojas de verificación (*checklist*), que han demostrado mejorar el rendimiento de los equipos y la resolución de problemas en ECMO<sup>53</sup>, por lo que deben utilizarse durante todas las fases del transporte en ECMO<sup>15</sup>, así como la realización de procedimientos estandarizados entrenados y puestos en práctica, mediante escenarios simulados.

**Recomendación 33.** Todo centro que realice transporte en ECMO debe elaborar protocolos y procedimientos de actuación específicos para el transporte de pacientes en ECMO. Estos protocolos deben incluir tanto aspectos organizativos y logísticos propios de cada centro como procedimientos estandarizados para el manejo clínico de las complicaciones del paciente en ECMO. [Clase A-III]

El transporte de pacientes en ECMO es tan específico que requiere de protocolos de actuación adaptados a cada centro y medio. En ellos debe incluirse el tratamiento clínico de los pacientes durante el transporte. Durante todo transporte se producen cambios ambientales en la presión, temperatura, humedad, y gravedad que pueden afectar gravemente la fisiología del paciente. Las consecuencias hemodinámicas de la aceleración y desaceleración, los cambios en presión atmosférica sobre la oxigenación y el funcionamiento de la membrana en los transportes aéreos, así como la posible aparición de hipotermia deben ser conocidas y prevenidas para evitar el deterioro del paciente en ECMO durante el transporte. El ruido y las vibraciones que se generan en algunos aparatos (especialmente helicópteros) pueden afectar al paciente y a la tripulación.

Las complicaciones mecánicas de la ECMO (rotura de circuitos, decanulación, etc.), aunque poco frecuentes, pueden ocurrir en algún momento del trayecto. Algunas pueden prevenirse siguiendo procedimientos estandarizados que abarquen todas las fases del trayecto incluyendo las transferencias entre camas y camillas, vehículos aéreos y terrestres. En este sentido es recomendable que el paciente viaje sedado y, si es preciso, paralizado; bien inmovilizado con cinturones y arneses homologados con todos los elementos del circuito ECMO, líneas vasculares y drenajes revisados y fijados; aparatos y dispositivos de soporte vital sujetos y anclados a sistemas certificados. La bomba manual de emergencia y los *clamps* para el circuito deben estar siempre accesibles por si ocurre un fallo eléctrico o una fuga en el circuito de

ECMO. En ocasiones es preciso realizar controles para mantener una anticoagulación adecuada. Se deben registrar las observaciones y eventos que ocurran durante todo el traslado. El equipo de profesionales debe permanecer sentado en todo momento y con los cinturones de seguridad colocados. Todas estas y otras medidas deben quedar recogidas en protocolos y procedimientos de actuación para dar la máxima seguridad a cada transporte.

**Recomendación 34. El equipo de ECMO que va a realizar el transporte debe comunicarse antes de salir con el equipo del hospital emisor para obtener la información final de la situación del paciente y dar recomendaciones claras sobre la preparación y recepción del equipo. Debe asegurarse, entre otras, la disponibilidad de un ecógrafo, de una reserva de hemoderivados cruzados y la valoración de los diferentes accesos vasculares.** [Clase A-III]

Los transportes en ECMO requieren una intensa planificación con mucha antelación a que se produzca una solicitud y no deben realizarse como un proceso ad hoc<sup>54</sup>. Aunque cada solicitud debe tomarse como un caso individual y decidirse independientemente, la información necesaria para transportar de forma segura a un paciente con ECMO debe ser universal y estandarizada mediante una lista de comprobación con los factores a considerar en la primera llamada que permita estimar la situación clínica del paciente y preparar el equipo de profesionales y el material necesario para el traslado<sup>29</sup>.

Debe obtenerse información sobre el paciente, especialmente referente a otros dispositivos (balón de contrapulsación, asistencia ventricular, vasodilatadores pulmonares inhalados, etc.) que requieran preparación logística adicional.

Durante la comunicación inicial entre los hospitales, el responsable del equipo de ECMO debe confirmar la disponibilidad, en el hospital de referencia, de algunos equipos y suministros necesarios entre ellos un ecógrafo con transductor para ecocardiografía y lineal para punción ecoguiada. Es imprescindible asegurarse de que se han realizado las pruebas cruzadas y tener una reserva de derivados sanguíneos disponible a la llegada del equipo para poder usarse en caso de complicación durante el procedimiento de canulación. Puede ser de gran utilidad disponer con antelación a la llegada del equipo de una valoración ecográfica de los accesos vasculares del paciente que debe incluir la notificación de los catéteres venosos o arteriales que lleve el paciente, la identificación de trombosis venosas o arteriales que puedan complicar la canulación y la medida del diámetro de los vasos para poder planificar la mejor estrategia de canulación.

**Recomendación 35. Los transportes en ECMO deben iniciarse con una reunión (*briefing*) del equipo para poner en común las características del paciente, preparar de forma individualizada el material necesario, establecer una estrategia de canulación inicial y anticiparse a los posibles problemas que puedan aparecer.** [Clase A-III]

El transporte en ECMO tiene como objetivo continuar el tratamiento que el paciente recibe en la UCI de la manera más segura posible durante todo el trayecto y estar en condiciones de proporcionar tratamiento de emergencia adicional si es necesario actuando como una extensión móvil de los centros de ECMO. La prioridad es la seguridad del equipo y del paciente. Por este motivo, antes de partir del centro de ECMO, deben analizarse la situación clínica y las necesidades de cada caso, las modalidades de soporte previstas o posibles, la distancia, el tiempo estimado y otros factores con el fin de definir el tipo de medio de transporte apropiado, la composición del equipo multiprofesional, el equipamiento y el material necesarios para el traslado. Para ello es indispensable una puesta en común todo el equipo, mediante un *briefing*, donde se comparta la información disponible y se establezca un plan de actuación que permita revisar y preparar el material necesario adaptado a las necesidades específicas de cada transporte.

**Recomendación 36. En caso de transporte aéreo, todo el personal del vuelo debe asistir a una sesión informativa de seguridad antes del despegue (*briefing* prevuelo).** [Clase A-III]

Cada aeronave es diferente y el conocimiento de un tipo no asegura un trabajo seguro en otra. Es recomendable el empleo regular del mismo vehículo con el que se familiarice el equipo. Las reuniones previas permiten revisar: la dotación y el estado óptimo del personal para volar y las funciones de cada de puesto, los equipos, medicamentos e intervenciones que deben estar acordes con la misión y el alcance de la atención del servicio de transporte aéreo.

El conocimiento de la distancia, velocidad, altura de vuelo y condiciones meteorológicas previstas, permite anticipar los efectos de los cambios de presión, humedad, temperatura y gravedad sobre el paciente y el equipo asistencial que lo acompaña<sup>55</sup>.

**Recomendación 37. En los transportes primarios, antes de iniciarse el procedimiento de canulación, deberá realizarse un *briefing* entre los equipos del hospital emisor y el equipo de ECMO para organizar el procedimiento, establecer roles, elegir la mejor estrategia de canulación, anticipar complicaciones y favorecer el buen trabajo entre el personal de ambos centros.** [Clase A-III]

Los principios para evitar eventos críticos durante el transporte se basan en una gran preparación, un liderazgo claro, una comunicación eficaz y una evaluación y estabilización adecuada del paciente. Durante el procedimiento de canulación de ECMO en un transporte primario van a coexistir en un mismo lugar y con un mismo paciente dos equipos de hospitales distintos. Para garantizar la seguridad del paciente es indispensable la buena organización entre ambos, poniendo a todo el equipo en situación, explicando qué procedimientos se van a realizar y definiendo claramente los roles de todo el personal que va a estar presente durante la canulación y entrada en ECMO.

**Recomendación 38.** Antes de proceder a la canulación del paciente se debe establecer una estrategia de canulación inicial, así como sus planes alternativos en caso de complicación o dificultad durante el procedimiento. La mejor estrategia de canulación dependerá de la situación del paciente, la experiencia del equipo y el material disponible. [Clase A-III]

El punto con mayor riesgo de complicación grave en un transporte primario es el procedimiento de canulación. Para minimizar estos riesgos recomendamos establecer un plan de canulación inicial que incluya la elección de los accesos vasculares que se van a utilizar y el tamaño y longitud de las cánulas escogidas. Además, deben establecerse las alternativas en caso de no poder proceder con el plan inicial de canulación. En caso de que el paciente tenga indicación de canulación veno-venosa se recomienda establecer también un plan de canulación veno-arterial de emergencia en caso de complicación en forma de inestabilidad hemodinámica o parada cardiorrespiratoria.

**Recomendación 39.** Antes de iniciarse la fase de transporte del paciente debe asegurarse su mayor estabilidad posible, el correcto funcionamiento de la ECMO, así como planificar la respuesta a las distintas emergencias comunes y anticiparse a las complicaciones. [Clase A-III]

Para poder iniciar el transporte de un paciente en ECMO, tanto primario como secundario, es indispensable asegurar que el paciente se encuentre lo más estable posible, así como realizar todas las pruebas complementarias que se consideren imprescindibles. También se asegurará el correcto funcionamiento de la consola y de la membrana de ECMO, ajustando flujos de sangre y de gas a los objetivos clínicos del paciente. En caso de inestabilidad o mal funcionamiento de la ECMO debe intentar solucionarse el problema antes del transporte, ya que la capacidad de resolución de problemas mayores (por ejemplo, la realización de un cambio de circuito de ECMO) estará limitada durante el trayecto. Por último, deben valorarse aquellas complicaciones esperables y anticipar su manejo o preparar la respuesta necesaria en caso de que ocurran durante el trayecto.

**Recomendación 40.** Antes de iniciar el transporte debe comprobarse que el paciente se encuentra asegurado a la camilla, todos los elementos móviles están fijados a estructuras rígidas mediante sus soportes homologados y que todo el equipo se encuentra sentado y con los cinturones de seguridad abrochados. [Clase A-III].

Uno de los riesgos de todo transporte son los accidentes de tráfico terrestres o aéreos. Para minimizar su impacto sobre el paciente y el equipo sanitario, debe asegurarse siempre que tanto el paciente, como el equipo sanitario y los elementos materiales móviles se encuentran



asegurados, mediante sujeciones y fijaciones homologadas que garanticen que no van a ser desprendidos como proyectiles en caso de accidente. Todo el personal debe ir sentado y con los cinturones de seguridad abrochados durante todo el trayecto. En caso de emergencia el conductor o piloto debe ser informado y el vehículo detenido si es necesario.

**Recomendación 41. Al finalizar todo transporte deberá realizarse un *debriefing* que incluya aspectos clínicos y técnicos con el objetivo de evaluar los problemas surgidos, fomentar el autoaprendizaje y establecer un plan de mejora del sistema de transporte aplicable a los siguientes traslados.** [Clase A-III]

Al finalizar un traslado se realizará un informe para la mejora del proceso identificando los obstáculos y compartiendo las soluciones adoptadas. La organización de una reunión informativa posterior (*debriefing*) al transporte de todo el equipo implicado es esencial para la mejora del proceso en el que se discute el informe elaborado sobre el traslado y se proponen las modificaciones que se podrían incorporar a los procedimientos y protocolos locales de traslado en ECMO<sup>55</sup>.

## BIBLIOGRAFÍA

- <sup>1</sup> Fletcher-Sandersjö A, Frenckner B, Broman M. A Single-Center Experience of 900 Interhospital Transports on Extracorporeal Membrane Oxygenation. *Ann Thorac Surg*. 2019;107:119–27.
- <sup>2</sup> Riera J, Argudo E, Martínez-Martínez M, García S, García-de-Acilu M, Santafé M, et al. Extracorporeal Membrane Oxygenation Retrieval in Coronavirus Disease 2019: A Case-Series of 19 Patients Supported at a High-Volume Extracorporeal Membrane Oxygenation Center. *Crit Care Explor*. 2020;2(10):e0228.
- <sup>3</sup> Krzak AM, Fowles JA, Vuylsteke A. Mobile extracorporeal membrane oxygenation service for severe acute respiratory failure - A review of five years of experience. *J Intensive Care Soc*. 2020;21:134–9.
- <sup>4</sup> Broman LM, Holzgraefe B, Palmér K, Frenckner B. The Stockholm experience: interhospital transports on extracorporeal membrane oxygenation. *Crit Care*. 2015;19:278.
- <sup>5</sup> Bréchet N, Mastroianni C, Schmidt M, Santi F, Lebreton G, Hoareau AM, et al. Retrieval of severe acute respiratory failure patients on extracorporeal membrane oxygenation: Any impact on their outcomes? *J Thorac Cardiovasc Surg*. 2018;155:1621–9.e2.
- <sup>6</sup> Gutsche JT, Miano TA, Vernick W, Raiten J, Bermudez C, Vallabjoysula P, et al. Does a Mobile ECLS Program Reduce Mortality for Patients Transported for ECLS Therapy for Severe Acute Respiratory Failure? *J Cardiothorac Vasc Anesth*. 2018;32:1137–41.
- <sup>7</sup> Wiegersma JS, Droogh JM, Zijlstra JG, Fokkema J, Ligtenberg JJ. Quality of interhospital transport of the critically ill: impact of a Mobile Intensive Care Unit with a specialized retrieval team. *Crit Care*. 2011;15:R75.
- <sup>8</sup> Fernández-Mondéjar E, Fuset-Cabanes MP, Grau-Carmona T, López-Sánchez M, Peñuelas Ó, Pérez-Vela JL, et al. Empleo de ECMO en UCI. Recomendaciones de la Sociedad Española de Medicina Intensiva Crítica y Unidades Coronarias. *Med Intensiva*. 2019;43:108–20.
- <sup>9</sup> Ericsson A, Frenckner B, Broman LM. Adverse Events during Inter-Hospital Transports on Extracorporeal Membrane Oxygenation. *Prehosp Emerg Care*. 2017;21:448–55.
- <sup>10</sup> D’Ancona G, Capitanio G, Chiaramonte G, Serretta R, Turrise M, Pilato M, et al. Extracorporeal membrane oxygenator rescue and airborne transportation of patients with influenza A (H1N1) acute respiratory distress syndrome in a Mediterranean underserved area. *Interact Cardiovasc Thorac Surg*. 2011;12:935–7.
- <sup>11</sup> Sen A, Blakeman S, DeValeria PA, Peworski D, Lanza LA, Downey FX, et al. Practical Considerations for and Outcomes of Interfacility ECMO Transfer of Patients With COVID-19 During a Pandemic: Mayo Clinic Experience. *Mayo Clin Proc Innov Qual Outcomes*. 2021;5:525–31.
- <sup>12</sup> Bryner B, Cooley E, Copenhaver W, Brierley K, Teman N, Landis D, et al. Two decades’ experience with interfacility transport on extracorporeal membrane oxygenation. *Ann Thorac Surg*. 2014;98:1363–70.
- <sup>13</sup> Forrest P, Ratchford J, Burns B, Herkes R, Jackson A, Plunkett B, et al. Retrieval of critically ill adults using extracorporeal membrane oxygenation: an Australian experience. *Intensive Care Med*. 2011;37:824–30.
- <sup>14</sup> Lebreton G, Schmidt M, Ponnaiah M, Folliguet T, Para M, Guihaire J, et al; Paris ECMO-COVID-19 investigators. Extracorporeal membrane oxygenation network organisation and clinical outcomes during the COVID-19 pandemic in Greater Paris, France: a multicentre cohort study. *Lancet Respir Med*. 2021 [En prensa]. doi: 10.1016/S2213-2600(21)00096-5.
- <sup>15</sup> Extracorporeal Life Support Organization (ELSO). Guidelines of ECMO transport; May 2015 [consultado 18 Jul 2021]. Disponible en: [https://www.else.org/Portals/0/Files/ELSO%20GUIDELINES%20FOR%20ECMO%20TRANSPORT\\_May2015.pdf](https://www.else.org/Portals/0/Files/ELSO%20GUIDELINES%20FOR%20ECMO%20TRANSPORT_May2015.pdf)
- <sup>16</sup> Combes A, Brodie D, Bartlett R, Brochard L, Brower R, Conrad S, et al; International ECMO Network (ECMONet). Position paper for the organization of extracorporeal membrane oxygenation programs for acute respiratory failure in adult patients. *Am J Respir Crit Care Med*. 2014;190:488–96.
- <sup>17</sup> Abrams D, Garan AR, Abdelbary A, Bacchetta M, Bartlett RH, Beck J, et al; International ECMO Network (ECMONet) and The Extracorporeal Life Support Organization (ELSO). Position paper for the organization of ECMO programs for cardiac failure in adults. *Intensive Care Med*. 2018;44:717–29.
- <sup>18</sup> Freeman CL, Bennett TD, Casper TC, Larsen GY, Hubbard A, Wilkes J, et al. Pediatric and neonatal extracorporeal membrane oxygenation: does center volume impact mortality? *Crit Care Med*. 2014;42:512–9.

- <sup>19</sup> Karamlou T, Vafaezadeh M, Parrish AM, Cohen GA, Welke KF, Permut L, et al. Increased extracorporeal membrane oxygenation center case volume is associated with improved extracorporeal membrane oxygenation survival among pediatric patients. *J Thorac Cardiovasc Surg.* 2013;145:470–5.
- <sup>20</sup> Barbaro RP, Odetola FO, Kidwell KM, Paden ML, Bartlett RH, Davis MM, et al. Association of hospital-level volume of extracorporeal membrane oxygenation cases and mortality. Analysis of the extracorporeal life support organization registry. *Am J Respir Crit Care Med.* 2015;191:894–901.
- <sup>21</sup> Javidfar J, Brodie D, Takayama H, Mongero L, Zwischenberger J, Sonett J, et al. Safe transport of critically ill adult patients on extracorporeal membrane oxygenation support to a regional extracorporeal membrane oxygenation center. *ASAIO J.* 2011;57:421–5.
- <sup>22</sup> Starck CT, Hasenclever P, Falk V, Wilhelm MJ. Interhospital transfer of seriously sick ARDS patients using veno-venous Extracorporeal Membrane Oxygenation (ECMO): Concept of an ECMO transport team. *Int J Crit Illn Inj Sci.* 2013;3:46–50.
- <sup>23</sup> Wilhelm MJ, Inderbitzin DT, Reser D, Halbe M, Van Tillburg K, Albrecht R, et al. Outcome of inter-hospital transfer of patients on extracorporeal membrane oxygenation in Switzerland. *Swiss Med Wkly.* 2019;149:w20054.
- <sup>24</sup> McDonald MD, Laudanski K, Vernick WJ, Bhardawaj A, Mackay E, Gutsche JT. Acute Respiratory Failure Managed via Inter-Facility Transport for Extracorporeal Life Support: A 3-Year Experience. *J Cardiothorac Vasc Anesth.* 2019;33:1865–70.
- <sup>25</sup> Di Nardo M, Lonero M, Pasotti E, Cancani F, Perrotta D, Cecchetti C, et al. The first five years of neonatal and pediatric transports on extracorporeal membrane oxygenation in the center and south of Italy: The pediatric branch of the Italian "Rete Respira" network. *Perfusion.* 2018;33:S24–30.
- <sup>26</sup> Cabrera AG, Prodhon P, Cleves MA, Fiser RT, Schmitz M, Fontenot E, et al. Interhospital transport of children requiring extracorporeal membrane oxygenation support for cardiac dysfunction. *Congenit Heart Dis.* 2011;6:202–8.
- <sup>27</sup> Gariboldi V, Grisoli D, Tarmiz A, Jaussaud N, Chavignac V, Kerbaul F, et al. Mobile extracorporeal membrane oxygenation unit expands cardiac assist surgical programs. *Ann Thorac Surg.* 2010;90:1548–52.
- <sup>28</sup> Burgueño P, González C, Sarralde A, Gordo F. Transporte interhospitalario con membrana de oxigenación extracorpórea: cuestiones a resolver. *Med Intensiva.* 2019;43:90–102.
- <sup>29</sup> Vieira J, Frakes M, Cohen J, Wilcox S. Extracorporeal Membrane Oxygenation in Transport Part 2: Complications and Troubleshooting. *Air Med J.* 2020;39:124–32.
- <sup>30</sup> Johnson DJ, Luscombe M. Aeromedical Transfer of the Critically Ill Patient. *J Intensive Care Soc.* 2011;12:307–12.
- <sup>31</sup> Corno AF, Faulkner GM, Harvey C. Mobile Extracorporeal Membrane Oxygenation. *ASAIO J.* 2021;67:594–600.
- <sup>32</sup> Labib A. Road transport on ECMO: The key elements. *Qatar Med J.* 2017;1:50.
- <sup>33</sup> Lucchini A, De Felippis C, Elli S, Gariboldi R, Vimercati S, Tundo P, et al. Mobile ECMO team for inter-hospital transportation of patients with ARDS: a retrospective case series. *Heart Lung Vessel.* 2014;6:262–73.
- <sup>34</sup> Burns BJ, Habig K, Reid C, Kernick P, Wilkinson C, Tall G, et al. Logistics and safety of extracorporeal membrane oxygenation in medical retrieval. *Prehosp Emerg Care.* 2011;15:246–53.
- <sup>35</sup> Delnoij TS, Veldhuijzen G, Strauch U, Van Mook WN, Bergmans DC, Bouman EA, et al. Mobile respiratory rescue support by off-centre initiation of extracorporeal membrane oxygenation. *Perfusion.* 2015;30:255–9.
- <sup>36</sup> Isgrò S, Patroniti N, Bombino M, Marcolin R, Zanella A, Milan M, et al. Extracorporeal membrane oxygenation for interhospital transfer of severe acute respiratory distress syndrome patients: 5-year experience. *Int J Artif Organs.* 2011;34:1052–60.
- <sup>37</sup> Real Decreto 836/2012, de 25 de mayo, por el que se establecen las características técnicas, el equipamiento sanitario y la dotación de personal de los vehículos de transporte sanitario por carretera. *BOE n.º 137, 41589–95; 2002.*
- <sup>38</sup> Li HY, Mendes PV, Melro LMG, Joelsons D, Besen BAMP, Costa ELV, et al. Characterization of patients transported with extracorporeal respiratory and/or cardiovascular support in the State of São Paulo; Brazil. *Rev Bras Ter Intensiva.* 2018;30:317–26.
- <sup>39</sup> Kim HS, Park S. Blood Transfusion Strategies in Patients Undergoing Extracorporeal Membrane Oxygenation. *Korean J Crit Care Med.* 2017;32:22–8.

- 
- <sup>40</sup> Organización Mundial de la Salud (OMS). Cadena de frío de la sangre. Guía para adquisición de equipos y accesorios. Ginebra; 2004.
- <sup>41</sup> Agerstrand CL, Burkart KM, Abrams DC, Bacchetta MD, Brodie D. Blood conservation in extracorporeal membrane oxygenation for acute respiratory distress syndrome. *Ann Thorac Surg*. 2015;99:590–5.
- <sup>42</sup> Brugger H, Paal P, Zafren K, Strapazon G, Musi ME. Are mobile ECMO teams necessary to treat severe accidental hypothermia? *Resuscitation*. 2021;158:301–2.
- <sup>43</sup> Condella A, Richards JB, Frakes MA, Grant CJ, Cohen JE, Wilcox SR. ECMO Transport without Physicians or Additional Clinicians. *Prehosp Disaster Med*. 2021;36:51–7.
- <sup>44</sup> NHSBT Appropriate Use of Blood Group & National Laboratory Managers' Group of the National Blood Transfusion Committee. Guidance for the Emergency Transfer of Blood and Components with Patients between Hospitals. [consultado 18 Jul 2021]. Disponible en: [https://www.transfusinguidelines.org/document-library/documents/nbtc\\_tlm\\_transfer\\_of\\_blood/download-file/nbtc\\_tlm\\_transfer\\_of\\_blood.pdf](https://www.transfusinguidelines.org/document-library/documents/nbtc_tlm_transfer_of_blood/download-file/nbtc_tlm_transfer_of_blood.pdf)
- <sup>45</sup> Broman LM. Inter-hospital transports on extracorporeal membrane oxygenation in different health-care systems. *J Thorac Dis*. 2017;9(9):3425–9.
- <sup>46</sup> SEMES-SEMICYUC. Traslado interhospitalario ante la pandemia de COVID-19 [consultado 18 Jul 2021]. Disponible en: <https://semicyuc.org/wp-content/uploads/2020/04/TIH-COVID19-V1-FINAL.pdf> y <https://www.semes.org/wp-content/uploads/2020/04/TIH-COVID19-V1.pdf>
- <sup>47</sup> Michaels AJ, Hill JG, Long WB, Young BP, Sperley BP, Shanks TR, et al. Adult refractory hypoxemic acute respiratory distress syndrome treated with extracorporeal membrane oxygenation: the role of a regional referral center. *Am J Surg*. 2013;205:492–9.
- <sup>48</sup> Bulpa P, Evrard P, Dive A, Pranger D, Gonzales M, Installe E. Inter-hospital transportation of patients with severe acute respiratory failure on extracorporeal membrane oxygenation. *Intensive Care Med*. 2002;28:802.
- <sup>49</sup> Wilson BJ Jr, Heiman HS, Butler TJ, Negaard KA, DiGeronimo R. A 16-year neonatal/pediatric extracorporeal membrane oxygenation transport experience. *Pediatrics*. 2002;109:189–93.
- <sup>50</sup> Heuer JF, Mirschel M, Bleckmann A, Quintel M, Moerer O. Interhospital transport of ARDS patients on extracorporeal membrane oxygenation. *J Artif Organs*. 2019;22:53–60.
- <sup>51</sup> Broman LM. Interhospital Transport on Extracorporeal Membrane Oxygenation of Neonates- Perspective for the Future. *Front Pediatr*. 2019;7:329.
- <sup>52</sup> Puślecki M, Ligowski M, Dąbrowski M, Stefaniak S, Ładzińska M, Pawlak A, et al. Development of regional extracorporeal life support system: The importance of innovative simulation training. *Am J Emerg Med*. 2019;37:19–26.
- <sup>53</sup> Stentz MJ, Wiepking MD, Hodge KA, Ramonell RP, Jabaley CS. Checklists Improve Team Performance During Simulated Extracorporeal Membrane Oxygenation Emergencies: A Randomized Trial. *Crit Care Explor*. 2021;3:e0404.
- <sup>54</sup> Vieira J, Frakes M, Cohen J, Wilcox S. Extracorporeal Membrane Oxygenation in Transport Part 1: Extracorporeal Membrane Oxygenation Configurations and Physiology. *Air Med J*. 2020;39:56–63.
- <sup>55</sup> Bascetta T, Bolton L, Kurtzman E, Hantzios W, Standish H, Margarido P, et al. Air Medical Transport of Patients Diagnosed With Confirmed Coronavirus Disease 2019 Infection Undergoing Extracorporeal Membrane Oxygenation: A Case Review and Lessons Learned. *Air Med J*. 2021;40:130–4.
